# Supplementary material
Source: PubMed Central journal article supplement (PMC6556405)
Supplement: NIHMS1517206-supplement-Fig_E9b.pdf [file NIHMS1517206-supplement-Fig_E9b.pdf]

cg02331902

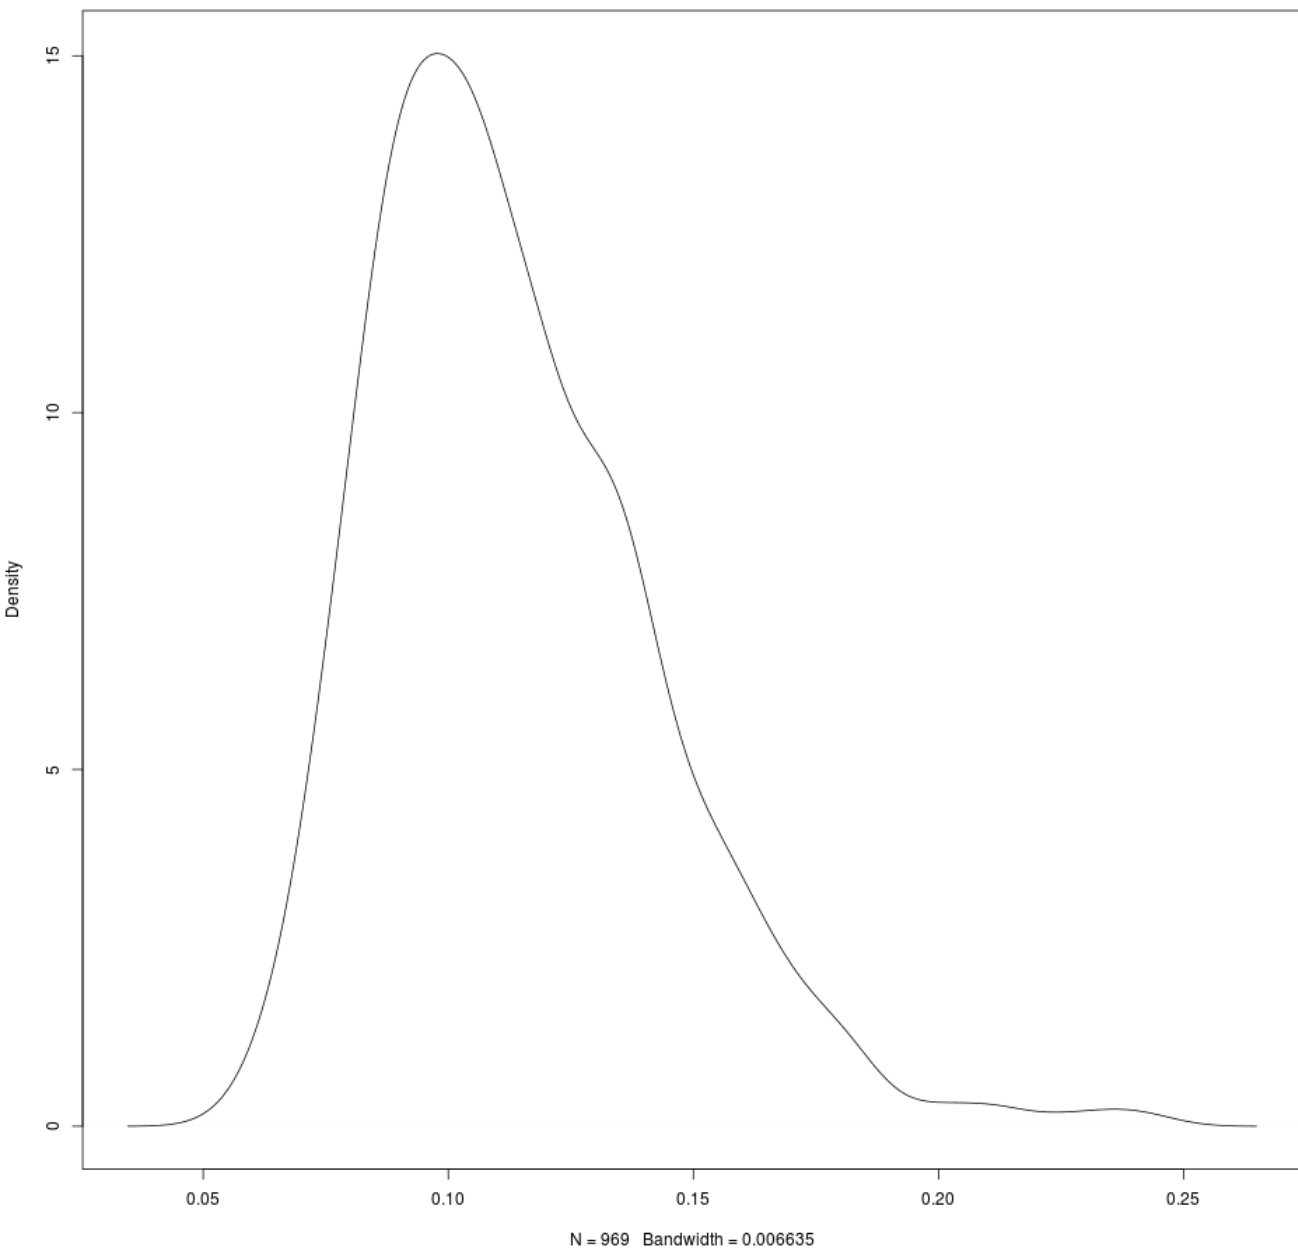

N = 969 Bandwidth = 0.006635

cg07156990

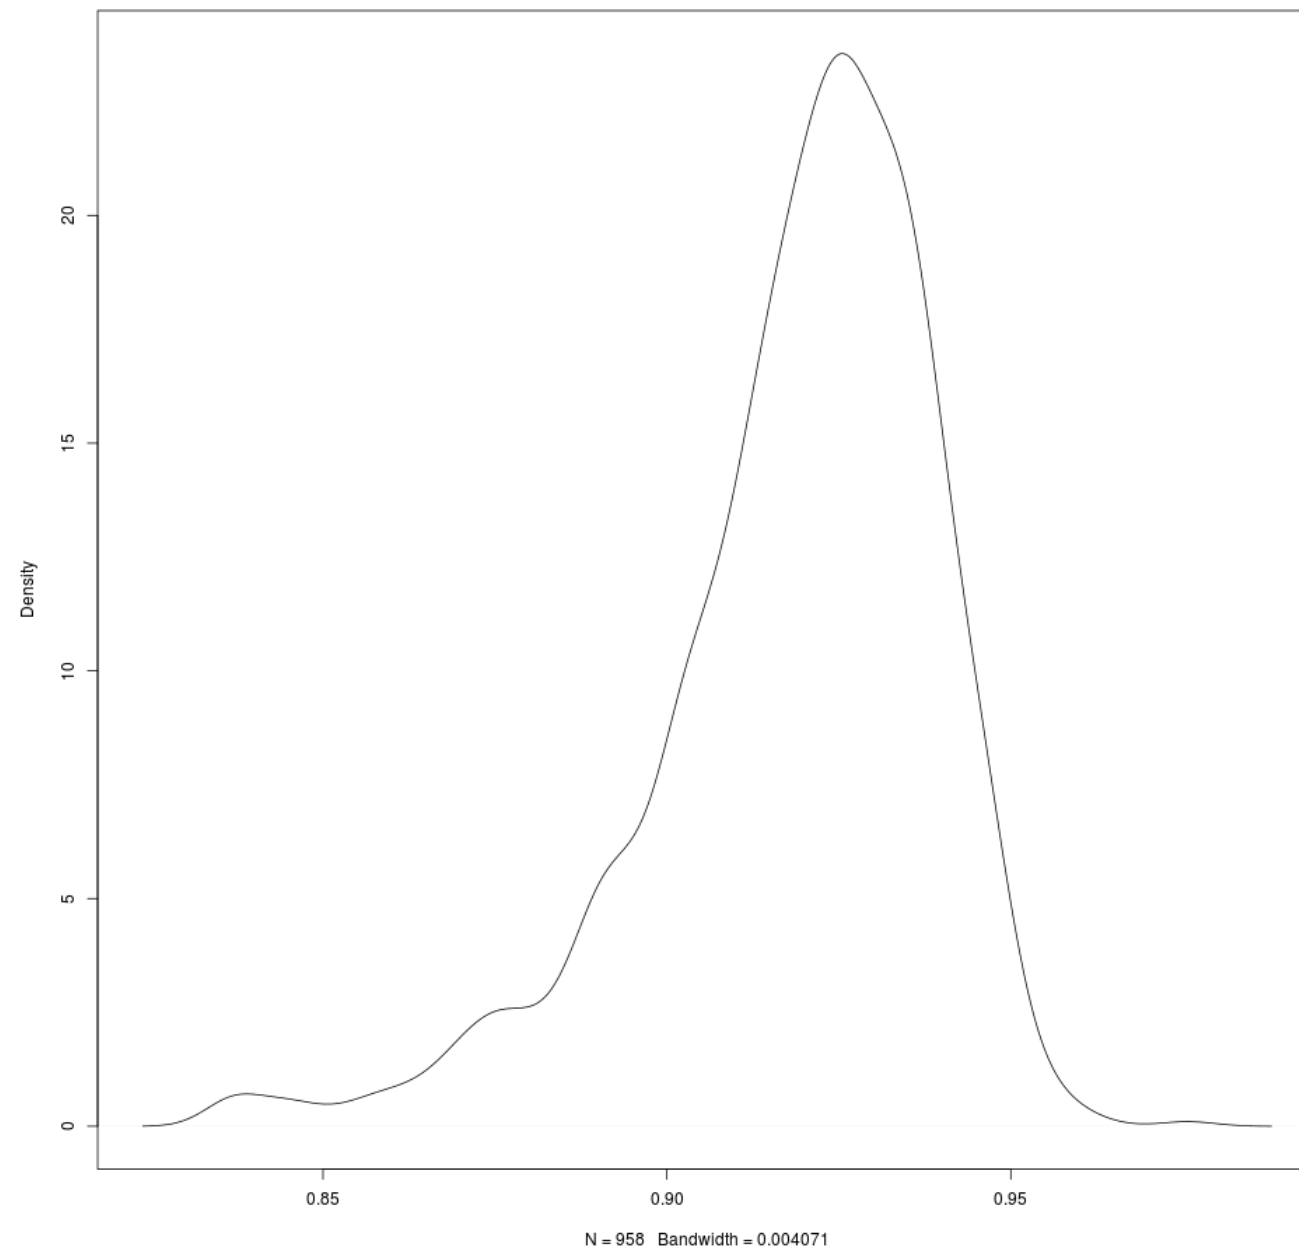

N = 958 Bandwidth = 0.004071

cg13289553

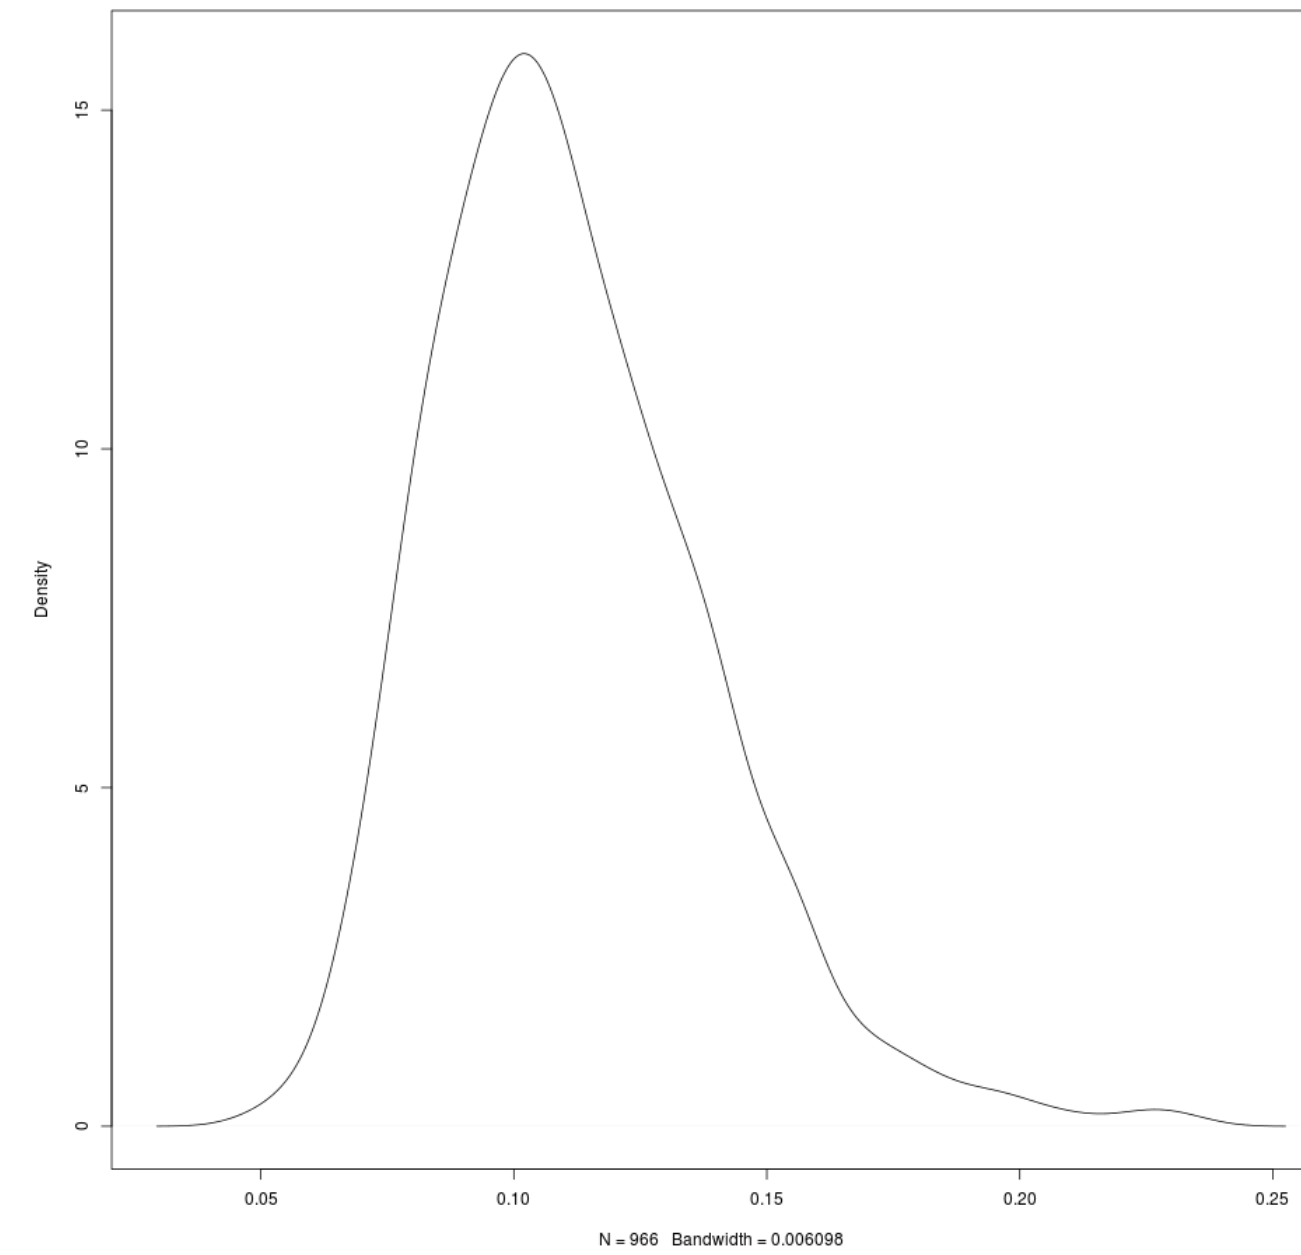

N = 966 Bandwidth = 0.006098

cg13427149

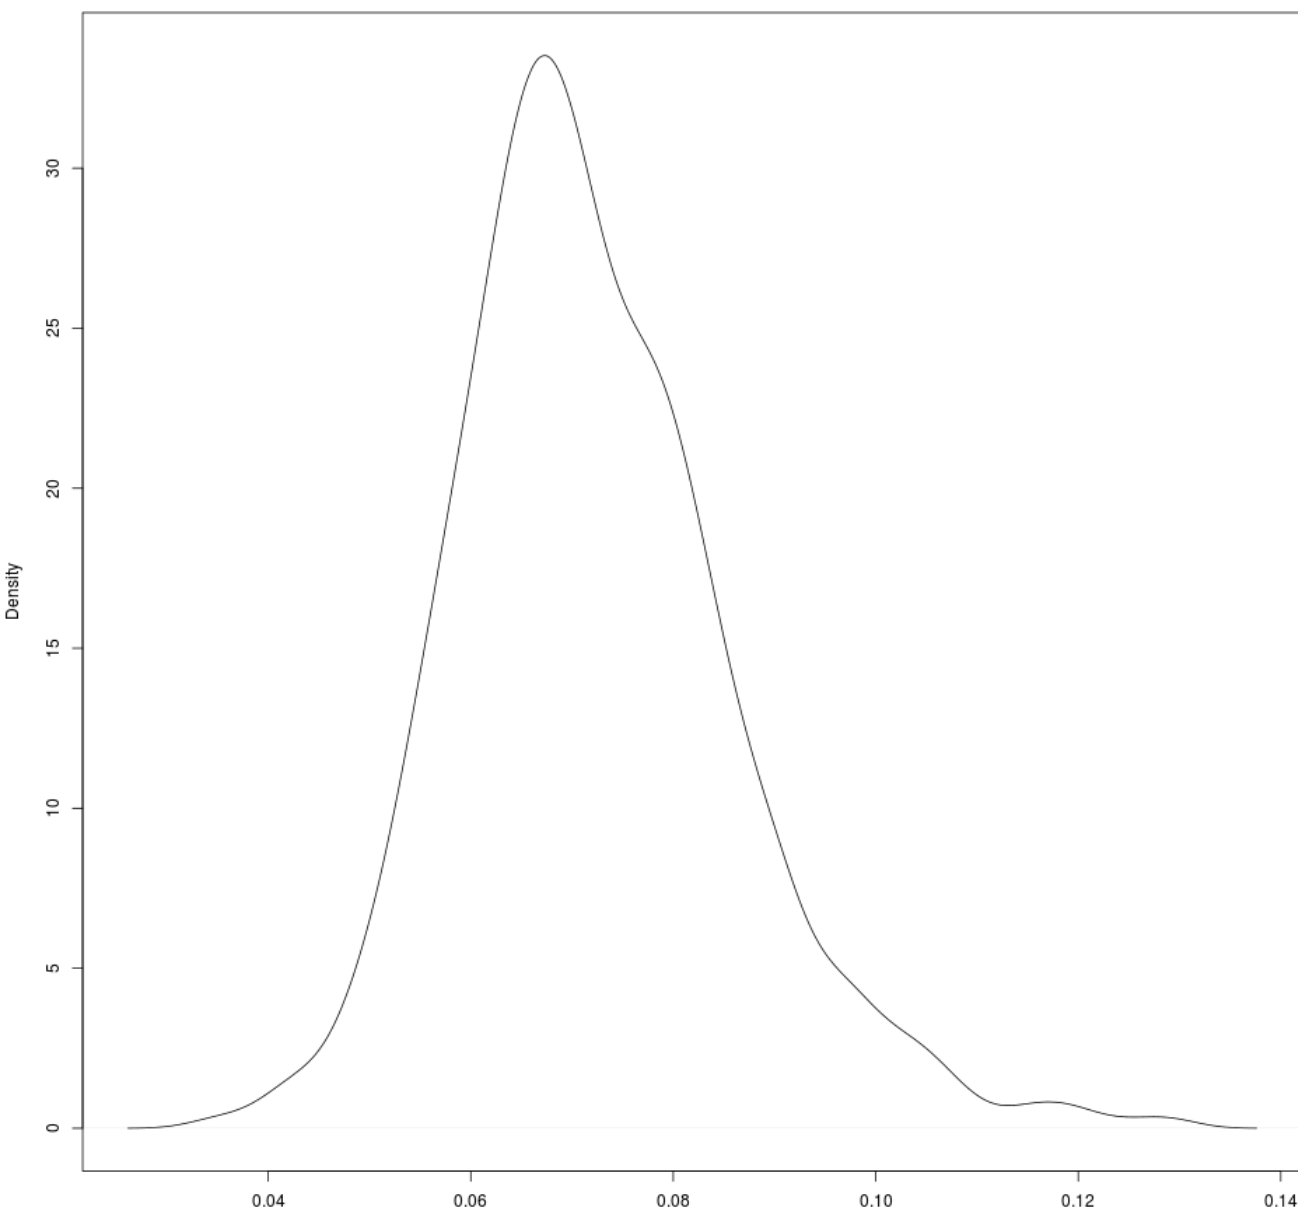

N = 964 Bandwidth = 0.002845

cg16792002

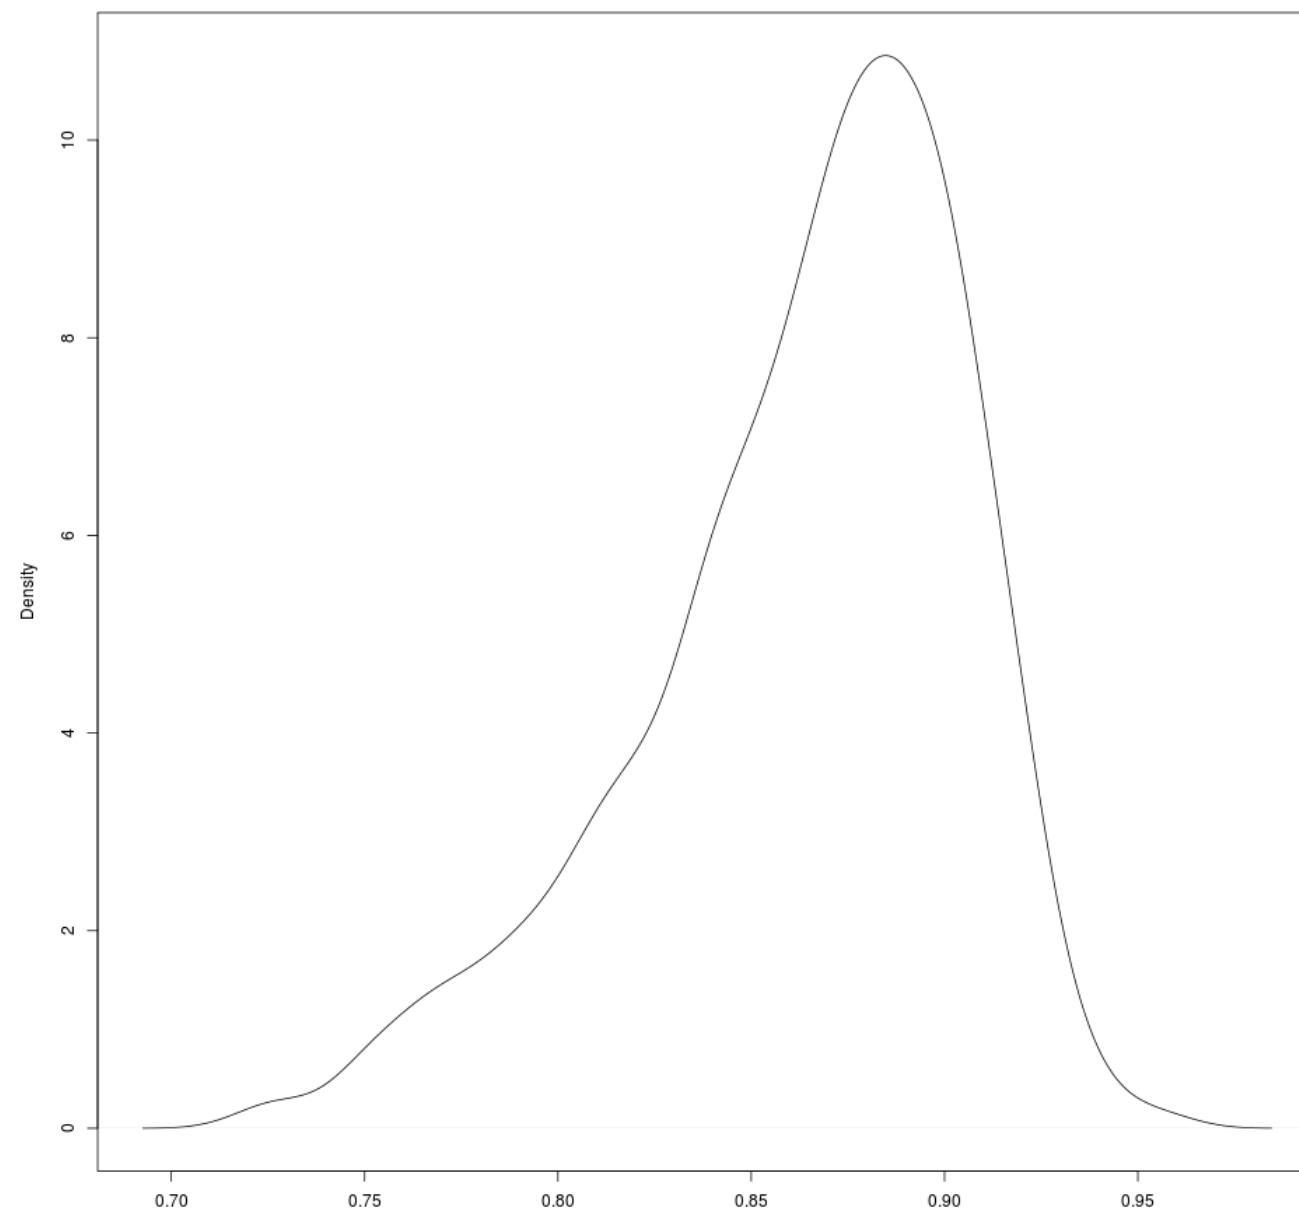

N = 968 Bandwidth = 0.009163

cg16792002

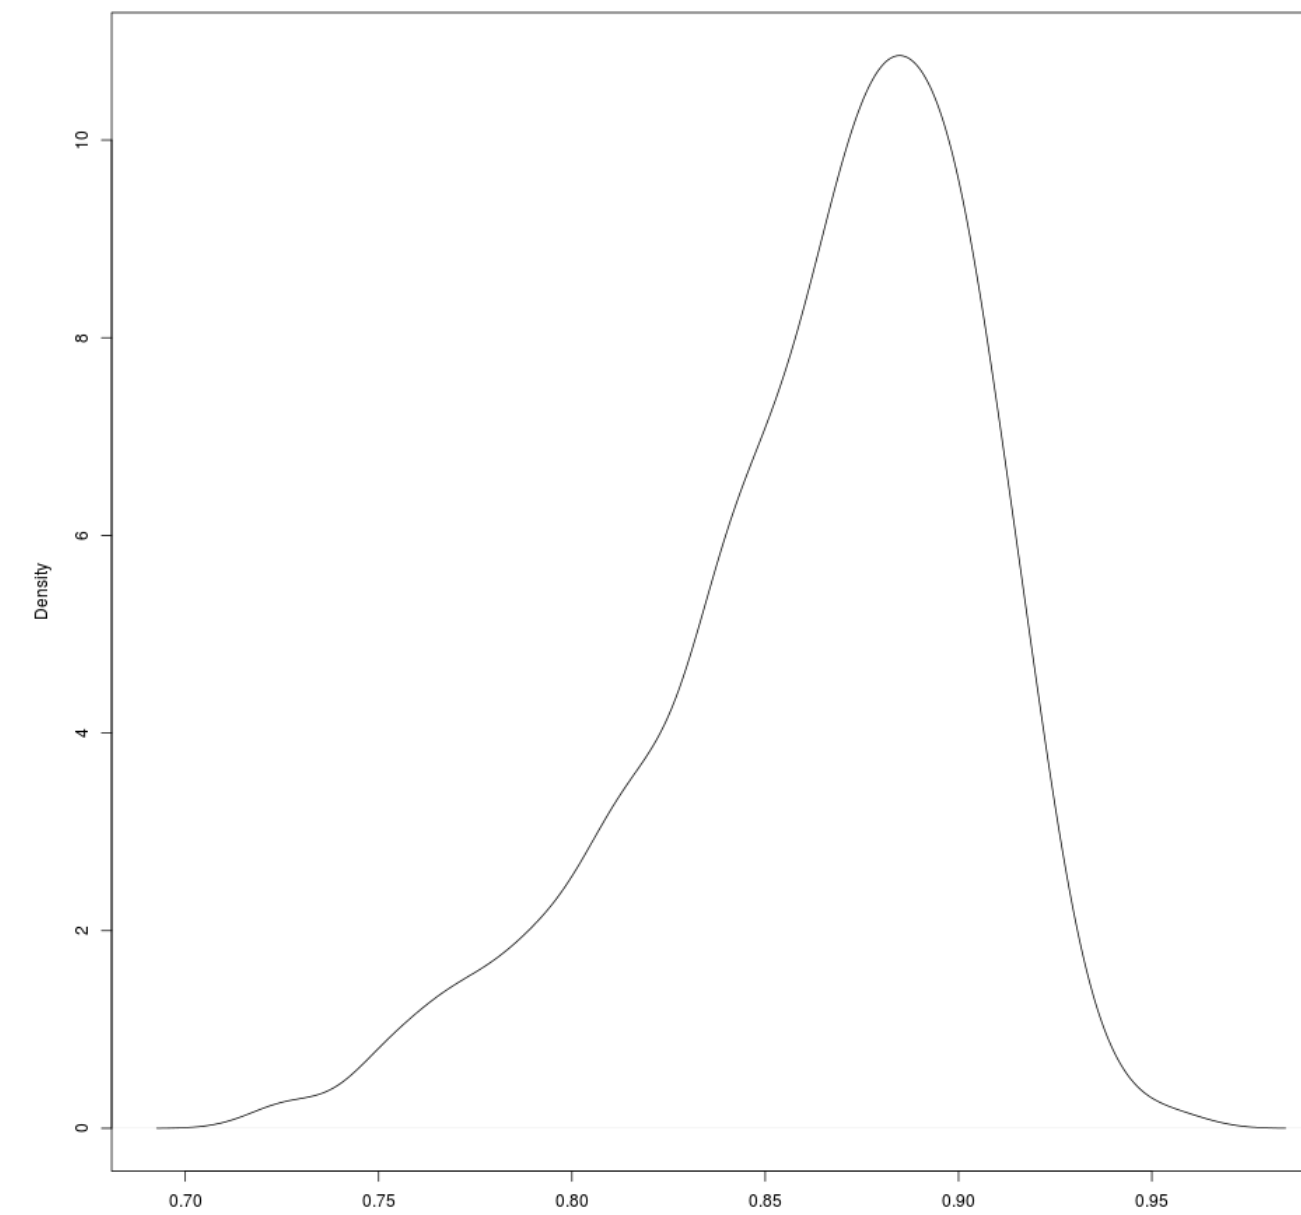

N = 968 Bandwidth = 0.009163

cg17333211

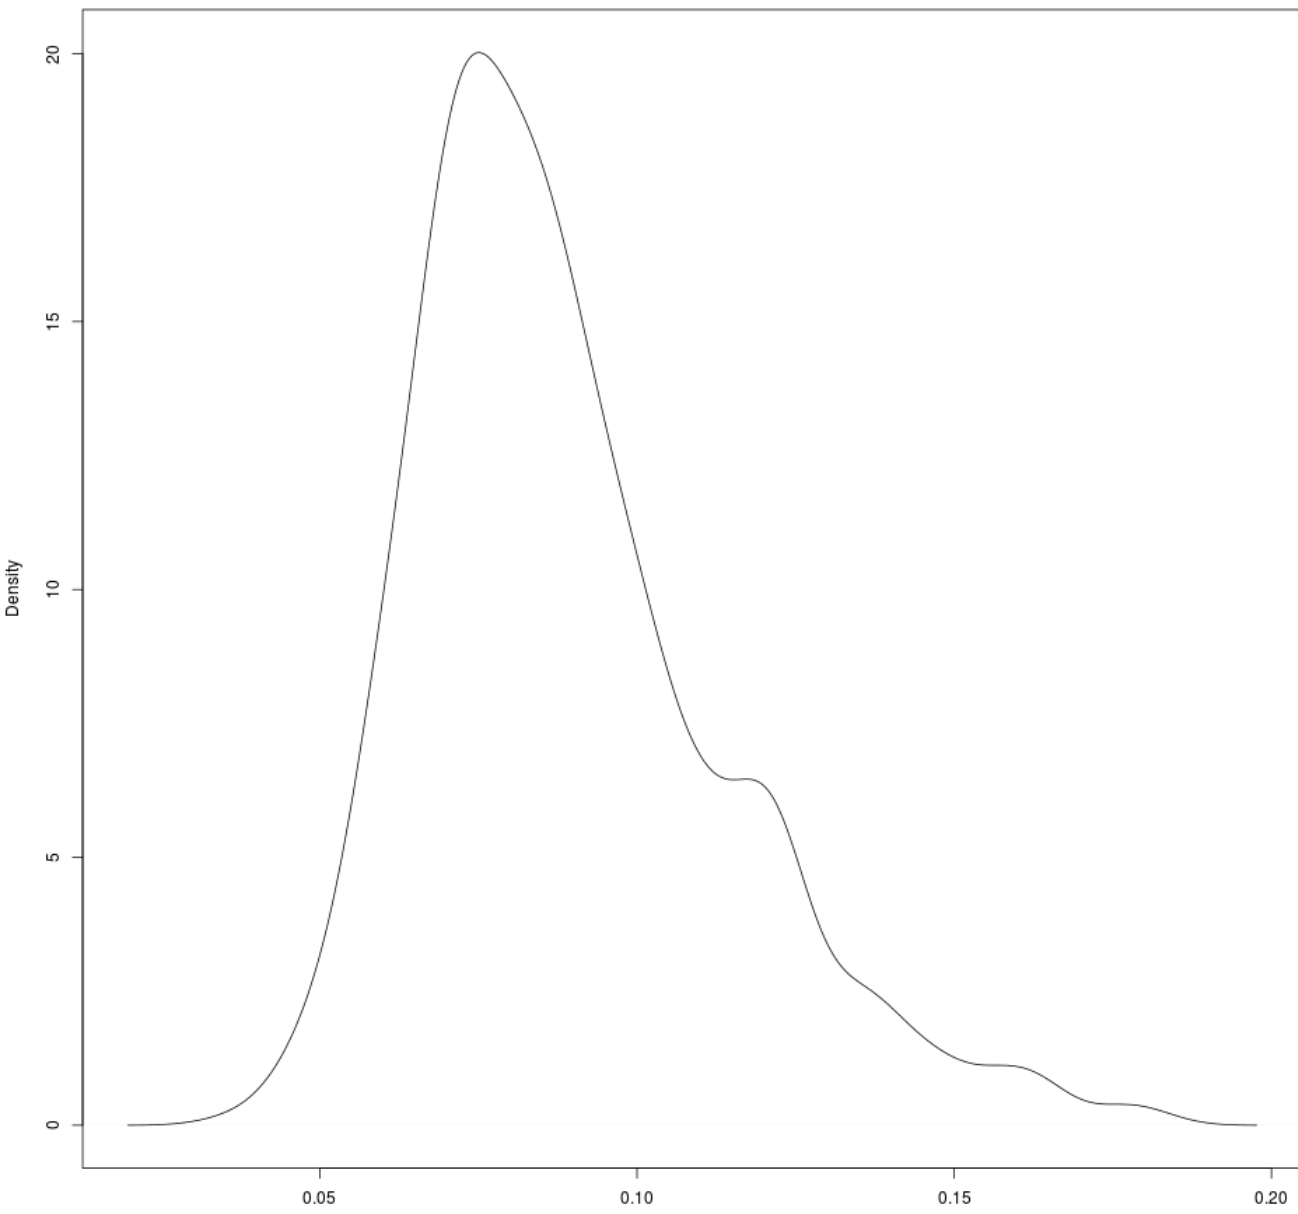

N = 964 Bandwidth = 0.005024

cg17333211

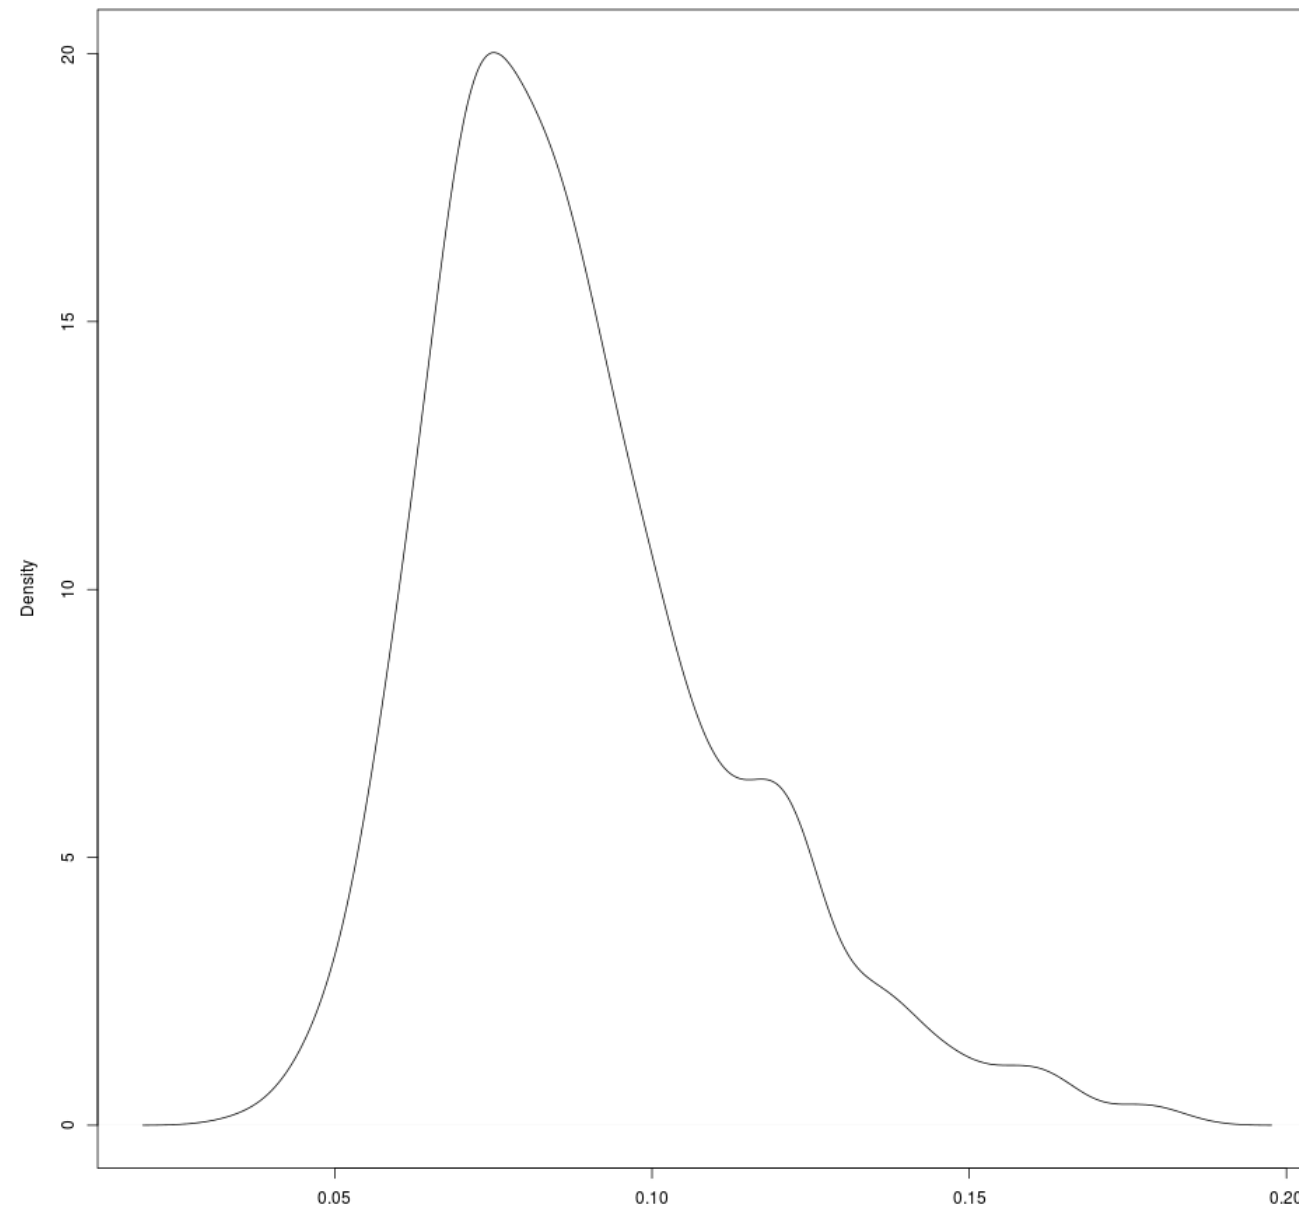

N = 964 Bandwidth = 0.005024

cg17333211

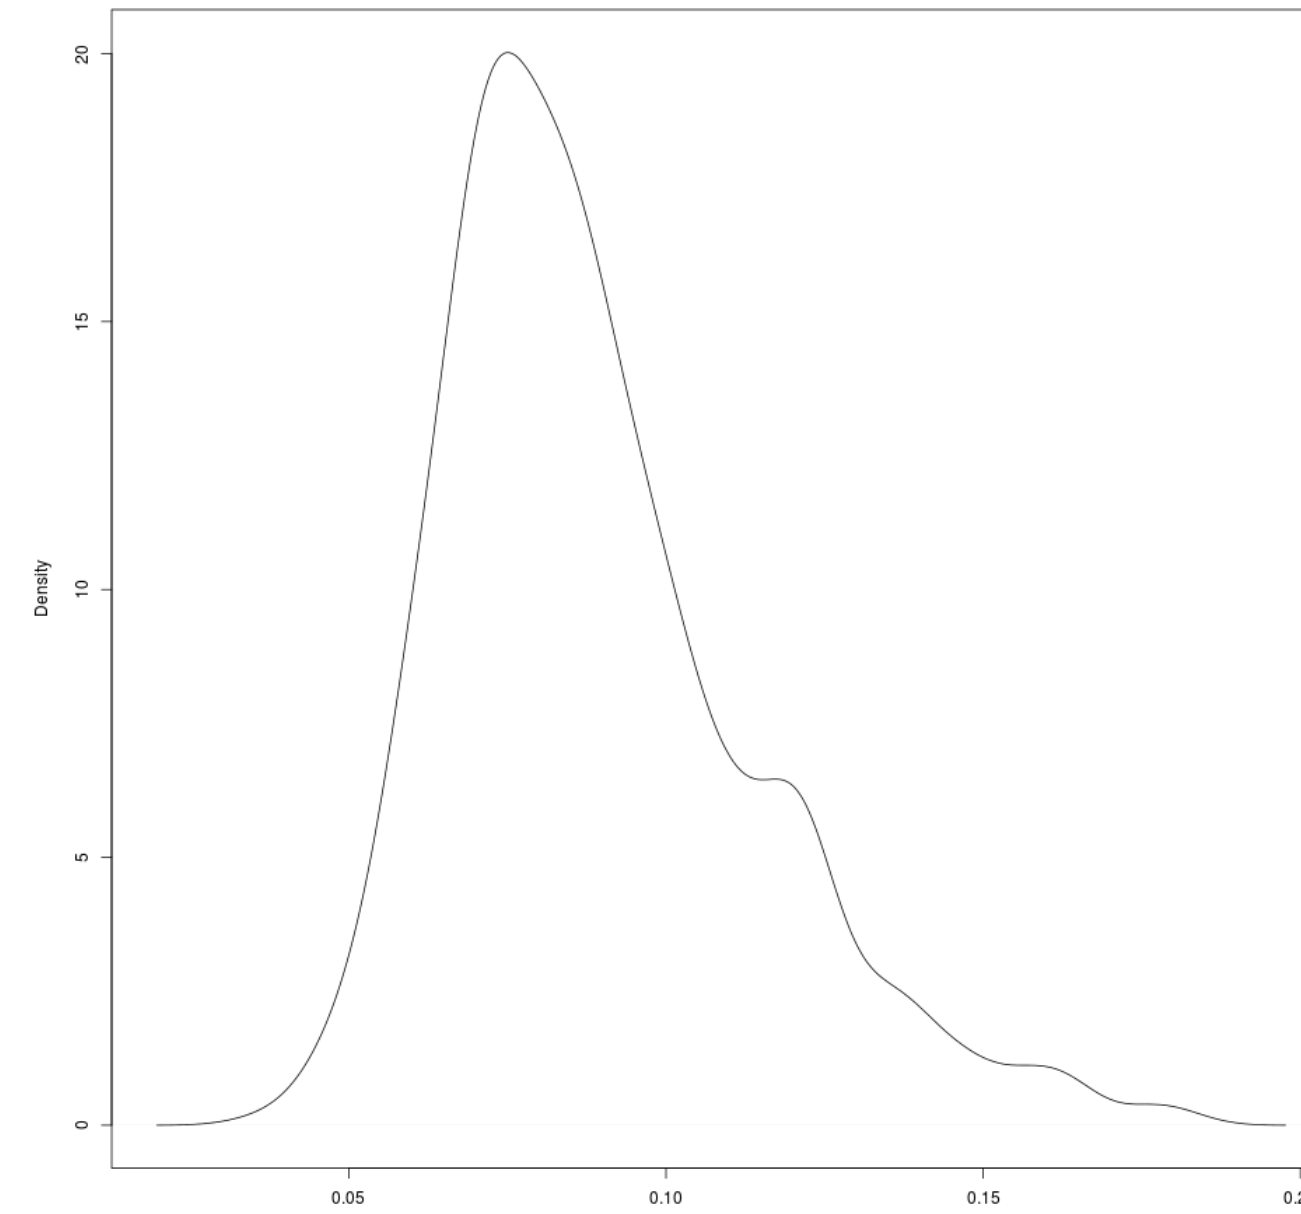

N = 964 Bandwidth = 0.005024
